# Supplementary material
Source: PubMed Central journal article supplement (PMC8613700)

## Supplemental Online Content

Choi J, Patil A, Vendrow E, et al. Practical computer vision application to compute total body surface area burn: reappraising a fundamental burn injury formula in the modern era. *JAMA Surg*. Published online November 24, 2021. doi:10.1001/jamasurg.2021.5848

**eFigure 1.** Eighteen segmented body regions

**eFigure 2.** Total body surface area to volume ratios of 3047 adults

This supplemental material has been provided by the authors to give readers additional information about their work.

**eFigure 1. Eighteen segmented body regions**

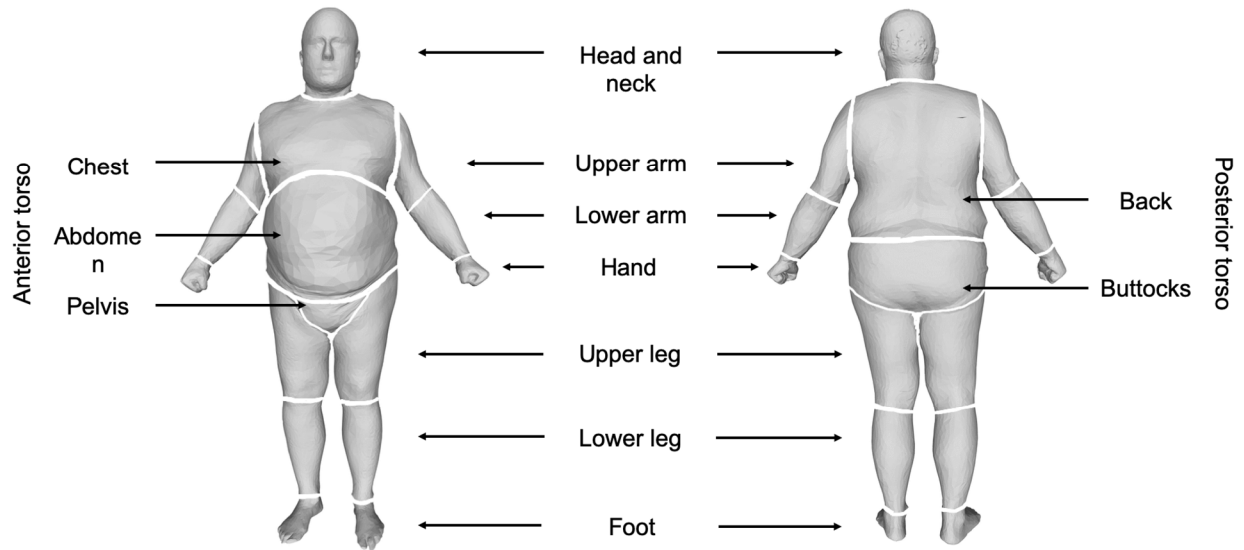

**eFigure 2. Total body surface area to volume ratios of 3047 adults**

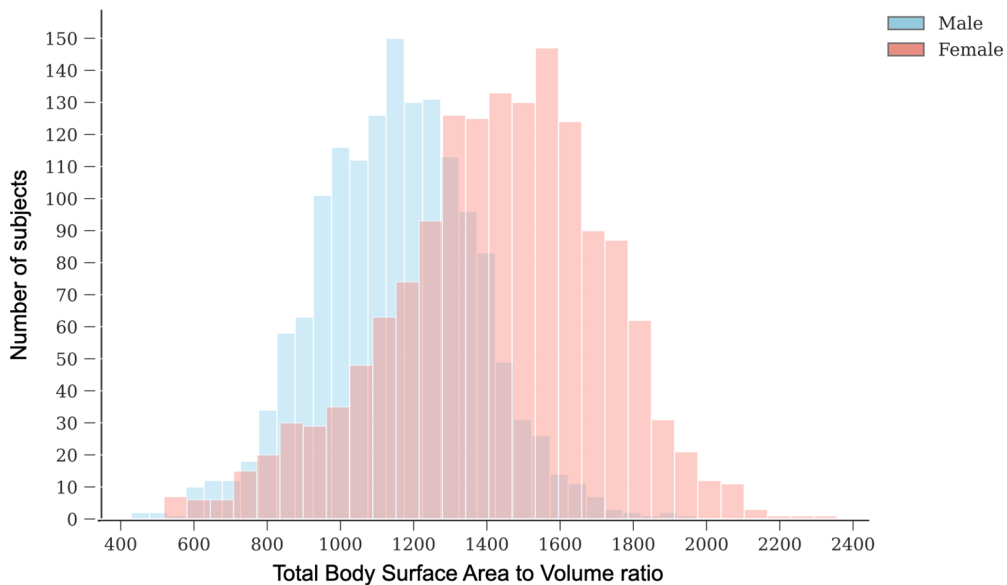

Supplement: jamasurg-e215848-s001.pdf [file jamasurg-e215848-s001.pdf]
